# Supplementary material for: Multi‐Institutional Practice‐Patterns in Fetal Congenital Heart Disease Following Implementation of a Standardized Clinical Assessment and Management Plan
Source: PubMed Central journal article supplement — J Am Heart Assoc. 2021 Jul 28;10(15):e021598. doi: 10.1161/JAHA.121.021598 (PMC8475692; doi:10.1161/jaha.121.021598), 2021-07-28
Supplement: JAH3-10-e021598-s001.pdf [file JAH3-10-e021598-s001.pdf]

# **Supplemental Material**

## Data S1.

### Supplemental Methods (SCAMP Protocol)

#### UCfC Congenital Heart Disease Delivery Management SCAMP

##### Background

A prenatal diagnosis of congenital heart disease (CHD) has been associated with lower birth weights and earlier gestational age at birth,<sup>1,2</sup> which have both been linked to decreased survival and neurodevelopmental outcomes in these neonates.<sup>3,4</sup> The UCfC study also noted these findings in addition to a higher rate of caesarean deliveries in mothers whose fetus had a prenatal diagnosis of CHD.

Prenatally diagnosed infants were born earlier (38.1 $\pm$ 0.11 vs 39 $\pm$ 0.14 weeks,  $p < 0.001$ ), had lower birth weights (2852  $\pm$  49 vs 3074  $\pm$  58g,  $p = 0.005$ ), and were more likely to be born by cesarean, both planned (37.2 vs 24.5%,  $p = 0.004$ ) and after a trial of labor (12.6 vs 7.6%,  $p = 0.017$ ).<sup>5</sup>

##### Goals:

1. Identify triggers leading to “early-term” deliveries
2. Identify triggers leading to cesarean deliveries
3. Decrease the rate of “early-term” deliveries in those with a prenatal diagnosis of CHD without other indications for early-term delivery
4. Decrease the rate of caesarean delivery in those with a prenatal diagnosis of CHD
5. Decrease length of stay and hospital costs in mothers of infants and infants with prenatal diagnosis of CHD

Inclusion: Women carrying a singleton fetus with a diagnosis of CHD starting at 32 wks gestation

##### CHD Diagnostic Categories:<sup>6</sup>

1. CHD w/o predicted risk of hemodynamic instability in the delivery room or first days of life
  - a. VSD
  - b. AVSD
2. CHD with minimal risk of hemodynamic instability in the delivery room but requires postnatal catheterization/surgery
  - a. Ductal-dependent lesions, including:
    - i. HLHS
    - ii. Critical coarctation
    - iii. Severe aortic stenosis
    - iv. Interrupted aortic arch
    - v. Pulmonary atresia with intact ventricular septum
    - vi. Severe tetralogy of Fallot

- b. Other lesions:
  - i. Truncus arteriosus
- 3. CHD with likely hemodynamic instability in the delivery room requiring immediate specialty care for stabilization
  - a. D-TGA with concerning atrial septum (reasonable to consider all d-TGA w/o ASD at risk)
  - b. Uncontrolled arrhythmias
  - c. Complete heart block with heart failure
- 4. CHD with expected hemodynamic instability with placental separation requiring immediate catheterization/surgery to improve survival
  - a. HLHS w/ restricted or intact atrial septum
  - b. D-TGA with restricted or intact atrial septum
  - c. Obstructed TAPVR
  - d. Ebstein's w/hydrops
  - e. TOF w/ absent pulmonary valve and severe airway obstruction
  - f. Uncontrolled arrhythmias with hydrops
  - g. Complete heart block with low ventricular rate, EFE, and/or hydrops

Guidelines and implementation of a pathway will result in the following when compared with historical controls (2011-2013, n= 186 prenatally diagnosed, required intervention w/in 30 days)

- Reduction in % of infants with a prenatal diagnosis of CHD that are born < 39 0/7 wks from \*\*\* to \*\*\*
- Reduction in % of infants with a prenatal diagnosis of CHD undergoing planned cesarean delivery by 25% (from 37% to 28%).

**Recommendations:**

Do not recommend routine delivery or induction <39+0 weeks

- Unless required for any other medically-indicated obstetrical reason

Recommend vaginal delivery with cesarean delivery only for obstetrical indications

- Unless required for delivery planning for CHD category 4 lesions
- With the exception of a fetus with complete heart block

Recommend prenatal genetic counseling

**Overall Summary of Prenatal Testing**

| Visit                    | OB/MFM Testing <sup>7,8</sup>                                                 | Cardiology Testing |
|--------------------------|-------------------------------------------------------------------------------|--------------------|
| 32, 34, 36 wks gestation | ANT starting at 32 0/7, twice weekly until delivery with Q4 week growth scan* | Fetal Echo q 4 wks |

\* Unless growth restricted and/or any other medical co-morbidities that require more frequent monitoring, i.e. weekly UA Dopplers with fetal growth restriction.

**OBSTETRICIAN (VISIT AT 32, 34, 36 wks)**

**Recommendations**

**Do not recommend routine delivery or induction <39 0/7 weeks**

- **Unless required for any other medically-indicated obstetrical reason**

**Recommend vaginal delivery with Cesarean section only for obstetrical indications**

- **Unless required for delivery planning for CHD category 4 lesions**
- **With the exception of a fetus with complete heart**

**Recommend prenatal genetic counseling**

CHD Diagnostic Category:

\_\_ Category 1: CHD w/o predicted risk of hemodynamic instability in the delivery room or first days of life.

(Examples: VSD, AVSD)

\_\_ Category 2: CHD with minimal risk of hemodynamic instability in the delivery room but requires postnatal catheterization/surgery

(Examples: Ductal-dependent lesions such as HLHS, severe AS, coarctation, interrupted aortic arch, PA/IVS, severe pulmonary stenosis, tetralogy of Fallot, others such as truncus arteriosus)

\_\_ Category 3: CHD with likely hemodynamic instability in the delivery room requiring immediate specialty care for stabilization

(Examples: D-TGA, uncontrolled arrhythmias, complete heart block with heart failure)

\_\_ Category 4: CHD with expected hemodynamic instability with placental separation requiring immediate catheterization/surgery to improve survival

(Examples: HLHS or D-TGA w/ restrictive of intact atrial septum, obstructed TAPVR, Ebstein's w/ hydrops, TOF w/ absent pulmonary valve and severe airway obstruction, uncontrolled arrhythmias with hydrops, complete heart block with low ventricular rate, EFE, or hydrops)

CHD diagnosis: \_\_\_\_\_

Estimated Gestational Age (EGA) at visit: \_\_\_ weeks \_\_\_ days

Planning antenatal testing twice weekly? Yes \_\_\_ No

If no, specify why \_\_\_\_\_

Type of antenatal testing? \_\_\_\_\_

Planning growth scan every 4 weeks? \_\_\_ Yes \_\_\_ No

If no, specify why \_\_\_\_\_

Planning to deliver < 39 0/7 wks?  Yes  No

If yes, specify why \_\_\_\_\_

Planned Mode of Delivery:  Vaginal  Cesarean

If cesarean delivery, indication (check all that apply):

Elective repeat cesarean delivery

Malpresentation

Cesarean delivery on maternal request

Necessary for care team coordination at delivery (CHD category 3 or 4)

Lives too far away from delivery center to allow natural onset of labor

Fetus with complete heart block

Other, please specify? \_\_\_\_\_

Did the patient receive prenatal genetic counseling?  Yes  No

## OBSTETRICIAN (AT DELIVERY)

### Recommendations

**Do not recommend routine delivery or induction <39 0/7 weeks**

- **Unless required for any other medically-indicated obstetrical reason**

**Recommend vaginal delivery with cesarean delivery only for obstetrical indications**

- **Unless required for delivery planning for CHD category 4 lesions**
- **With the exception of a fetus with complete heart block**

CHD Diagnostic Category:

    Category 1: CHD w/o predicted risk of hemodynamic instability in the delivery room or first days of life.

(Examples: VSD, AVSD)

    Category 2: CHD with minimal risk of hemodynamic instability in the delivery room but requires postnatal catheterization/surgery

(Examples: Ductal-dependent lesions such as HLHS, severe AS, coarctation, interrupted aortic arch, PA/IVS, severe pulmonary stenosis, tetralogy of Fallot, others such as truncus arteriosus)

    Category 3: CHD with likely hemodynamic instability in the delivery room requiring immediate specialty care for stabilization

(Examples: D-TGA, uncontrolled arrhythmias, complete heart block with heart failure)

    Category 4: CHD with expected hemodynamic instability with placental separation requiring immediate catheterization/surgery to improve survival

(Examples: HLHS or D-TGA w/ restrictive or intact atrial septum, obstructed TAPVR, Ebstein's w/ hydrops, TOF w/ absent pulmonary valve and severe airway obstruction, uncontrolled arrhythmias with hydrops, complete heart block with low ventricular rate, EFE, or hydrops)

CHD diagnosis: \_\_\_\_\_

Estimated Gestational Age (EGA) at Delivery:     weeks     days

If EGA <39 weeks, why (check all that apply)?

    Spontaneous labor

    Growth Restriction (EFW: < 10<sup>th</sup> %ile or AC < 5<sup>th</sup> %ile) Yes     No     Unknown

    Non-Reassuring Fetal Status (Based on Non-Stress Test or Biophysical Profile)

    Other, specify? \_\_\_\_\_

Elective Induction:     Yes     No

If induction, indication (check all that apply):

Maternal

- Preeclampsia with or without severe features
- Gestational Hypertension with or without severe features
- Chronic Hypertension with or without severe features
- Diabetes (Type 1 or Type 2)
- Diabetes (Gestational, A1 or A2)
- Other, specify: \_\_\_\_\_

Feta  
|

- Intrauterine growth restriction (EFW: < 10%ile or AC <5<sup>th</sup> %ile)
- Abnormal interval growth
- Abnormal umbilical artery Doppler assessment
- Non-Reassuring Fetal Status (e.g. Based on Non-Stress Test or Biophysical Profile)
- Necessary for care team coordination at delivery
- Lives too far away from delivery center to allow natural onset of labor
- Other, specify? \_\_\_\_\_



Mode of Delivery:    \_\_\_Vaginal                   \_\_\_CesareanIf

Cesarean section, indication (check all that apply):

\_\_\_Repeat cesarean delivery

\_\_\_Malpresentation

\_\_\_Arrest of Dilation

\_\_\_Arrest of Descent

\_\_\_Non-Reassuring Fetal Status

\_\_\_Caesarean delivery on Maternal Request

\_\_\_Necessary for care team coordination at delivery

\_\_\_Lives too far away from delivery center to allow natural onset of labor

\_\_\_Fetus with complete heart block

**Table S1. Hypertensive (HTN) disease of pregnancy\* by CHD category.**

|                                         | <b>No HTN disease of pregnancy<br/>n=270<br/>% (n)</b> | <b>HTN disease of pregnancy*<br/>n=34<br/>% (n)</b> | <b>p-value<sup>#</sup></b> |
|-----------------------------------------|--------------------------------------------------------|-----------------------------------------------------|----------------------------|
| <b>Low-risk</b>                         | 36% (96)                                               | 41% (14)                                            | 0.32                       |
| <b>High-risk</b>                        |                                                        |                                                     |                            |
| Minimal risk of hemodynamic instability | 50% (134)                                              | 56% (19)                                            |                            |
| Likely hemodynamic instability          | 9% (26)                                                | 0% (0)                                              |                            |
| Expected hemodynamic instability        | 4% (13)                                                | 3% (1)                                              |                            |
| <b>Unknown</b>                          | 1% (1)                                                 | 0% (0)                                              |                            |

\*HTN disease of pregnancy = gestational hypertension (HTN), preeclampsia, and HELLP

<sup>#</sup>Fisher's exact

**Table S2. Fetal growth restriction (FGR) by CHD category.**

|                                         | <b>No FGR<br/>n=290<br/>% (n)</b> | <b>FGR<br/>n=14<br/>% (n)</b> | <b>p-value<sup>#</sup></b> |
|-----------------------------------------|-----------------------------------|-------------------------------|----------------------------|
| <b>Low-risk</b>                         | 37% (106)                         | 29% (4)                       | 0.89                       |
| <b>High-risk</b>                        |                                   |                               |                            |
| Minimal risk of hemodynamic instability | 50% (144)                         | 64% (9)                       |                            |
| Likely hemodynamic instability          | 8% (25)                           | 7% (1)                        |                            |
| Expected hemodynamic instability        | 4% (14)                           | 0% (0)                        |                            |
| <b>Unknown</b>                          | 1% (1)                            | 0% (0)                        |                            |

#Fisher's exact
